# Supplementary material
Source: PubMed Central journal article supplement (PMC3252903)
Supplement: 1115772108_pnas.201115772SI.pdf [file 1115772108_pnas.201115772SI.pdf]

# Supporting Information

Ravilious et al. 10.1073/pnas.1115772108

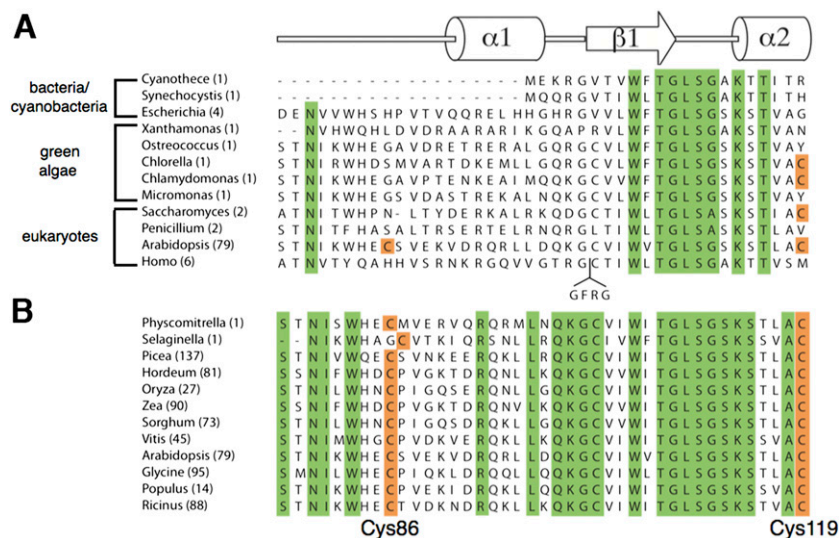

**Fig. S1.** Sequence alignment of representative adenosine-5'-phosphosulfate kinase (APSK) from bacteria, cyanobacteria, green algae, and eukaryotes (A) and plant species (B). The secondary structure of the APSK from *Arabidopsis thaliana* (AtAPSK) is shown above the alignment. Invariant residues are highlighted in green. Conserved cysteines corresponding to those in AtAPSK that form the disulfide bond are highlighted in orange.

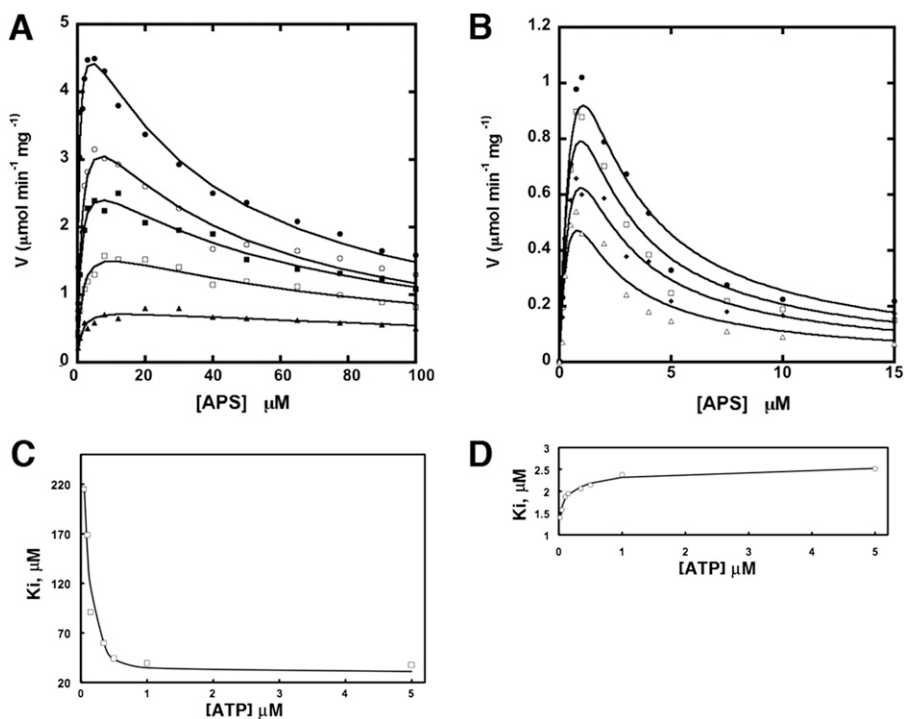

**Fig. S2.** Velocity curves of  $v$  vs. APS concentration for (A) AtAPSK<sub>red</sub>, (B) AtAPSK<sub>ox</sub>, and (C and D) the effect of [ATP] on  $K_i$  of AtAPSK<sub>red</sub> and AtAPSK<sub>ox</sub>. (A) Initial velocities were measured at 5 mM (●), 1 mM (○), 0.35 mM (■), 0.15 mM (□), and 0.05 mM (▲) ATP. The curves represent best fits to the general substrate inhibition model described in *Materials and Methods*. (B) Initial velocities were measured at 5 mM (●), 0.5 mM (□), 0.1 mM (◆), 0.025 mM (△) ATP. (C and D) Effect of ATP concentration on  $K_i$  of AtAPSK<sub>red</sub> (C) and AtAPSK<sub>ox</sub> (D).

**Table S1. Summary of crystallographic statistics**

| Parameter                                                       | Detail                               |
|-----------------------------------------------------------------|--------------------------------------|
| Crystal                                                         | AtAPSK•AMP-PNP•Mg <sup>2+</sup> •APS |
| Space group                                                     | C2                                   |
| Cell dimensions, Å*                                             |                                      |
| <i>a</i>                                                        | 121.1                                |
| <i>b</i>                                                        | 95.31                                |
| <i>c</i>                                                        | 73.33                                |
| Cell β, °                                                       | 114.1                                |
| Data collection                                                 |                                      |
| Wavelength, Å                                                   | 0.979                                |
| Resolution range (highest shell resolution), Å                  | 30.5–1.80 (1.83–1.80)                |
| Reflections                                                     |                                      |
| Total                                                           | 255,905                              |
| Unique                                                          | 69,476                               |
| Completeness (highest shell), %                                 | 98.0 (98.4)                          |
| <I/σ> (highest shell)                                           | 34.1 (1.7)                           |
| R <sub>sym</sub> <sup>a</sup> (highest shell), %                | 3.2 (44.1)                           |
| Model and refinement                                            |                                      |
| R <sub>cryst</sub> <sup>b</sup> /R <sub>free</sub> <sup>c</sup> | 17.3/20.1                            |
| No. of protein atoms                                            | 4,525                                |
| No. of water molecules                                          | 479                                  |
| No. of ligand atoms                                             | 177                                  |
| rmsd, bond lengths, Å                                           | 0.006                                |
| rmsd, bond angles, °                                            | 1.08                                 |
| Average B-factor, Å <sup>2</sup>                                |                                      |
| Protein                                                         | 39.5                                 |
| Waters                                                          | 50.0                                 |
| Ligands                                                         | 46.0                                 |
| Stereochemistry, %                                              |                                      |
| Most favored                                                    | 97.5                                 |
| Allowed                                                         | 2.3                                  |
| Generously allowed                                              | 0.2                                  |

\**a*, R<sub>sym</sub> =  $\sum |I_h - \langle I_h \rangle| / \sum I_h$ , where  $\langle I_h \rangle$  is the average intensity over symmetry; *b*, R<sub>cryst</sub> =  $\sum |F_o - \langle F_c \rangle| / \sum F_o$ , where summation is over the data used for refinement; *c*, R<sub>free</sub> is defined the same as R<sub>cryst</sub>, but was calculated using 5% of data excluded from refinement.

**Table S2. Oligonucleotides used for generation of the AtAPSK C86A/C119A mutant and for cloning of APSK from *Synechocystis* sp. PCC 6803**

| Mutant    | Oligonucleotide                                      |
|-----------|------------------------------------------------------|
| C86A-F    | 5'-dCTCGACAAATATAAAGTGGCATGAAGCTTCTGTTG-3'           |
| C86A-R    | 5'-dCTGTCTATCAACTTTCTCAACAGAAAGCTTCATGCC-3'          |
| C119A-F   | 5'-dGGGAAGAGTACTTTGGCTGCTGCTTTG-3'                   |
| C119A-R   | 5'-dCAACATCTGATTCAAAGCAGCAGCCAAAG-3'                 |
| SynAPSK-F | 5'-dTTTATGGCTAGCATGCAACAACGTGGCGTAAC-3'              |
| SynAPSK-R | 5'-dATAGAATTCGTTAGCCCTCGATATATTTAGATCTACTAGCTTCTG-3' |

Mutated codons are italicized, restriction sites are underlined, and start/stop codons are shown in bold.
